# Supplementary material
Source: PubMed Central journal article supplement (PMC5123677)
Supplement: NIHMS819957-supplement-Supp_Data.pdf [file NIHMS819957-supplement-Supp_Data.pdf]

# Supplemental Materials for “Mendelian Randomization Analysis of a Time-varying Exposure for Binary Disease Outcomes using Functional Data Analysis Methods”

by Ying Cao, Suja S. Rajan, and Peng Wei

## Supplemental Methods

### *Mendelian Randomization (MR) Analysis by Individual Clinical Visits.*

For cohort studies with a fixed number of clinical visits, an alternative way of conducting MR analysis for the longitudinal exposure data is to perform standard MR analysis by using the exposure data collected from each visit and then calculate the minimum p-value (minP). For example, the Offspring Cohort of the FHS study had seven clinical visits. We can conduct the standard MR analysis for each visit and then use the minP of the seven analyses as the final result. Following the notation in the main text, we let  $J_1 = J_2 = \dots = J_n = J$ , meaning that all the subjects had the same number of measurements for the exposure variable. For  $j = 1, \dots, J$ , 2SRI is conducted. Specifically, a linear regression model is fitted for  $x_{ij}$  in the first stage:

$x_{ij} = \beta_{0j} + \beta_{1j}G_i + \beta_{2j}Z_i + v_{ij}$  to obtain the fitted residual  $\hat{v}_{ij}$ . Then a logistic regression

model is fitted in the second stage:  $\log\left(\frac{E(y_i)}{1-E(y_i)}\right) = \alpha_{0j} + \alpha_{1j}x_{ij} + \alpha_{2j}Z_i + \alpha_{3j}\hat{v}_{ij}$ , where

$E(y_i)$  is the expected value of  $y_i$ . We can obtain the p-value  $p_j$  from testing the null

hypothesis  $H_0: \alpha_{1j} = 0$  using a Wald test with the robust standard error, for  $j = 1, \dots, J$ .

Then  $\text{minP} = \min(p_1, p_2, \dots, p_J)$  is compared with the Bonferroni corrected significance

level, for example,  $0.05/J$ . The limitations of the minP method are: first, not all the subjects

have data collected for each clinical visit, leading to varying sample size of each analysis,

and second, the Bonferroni correction may lead to power loss.

**Figure S1.** The smoothed mean BMI function and mean HDL function by the PACE procedure.

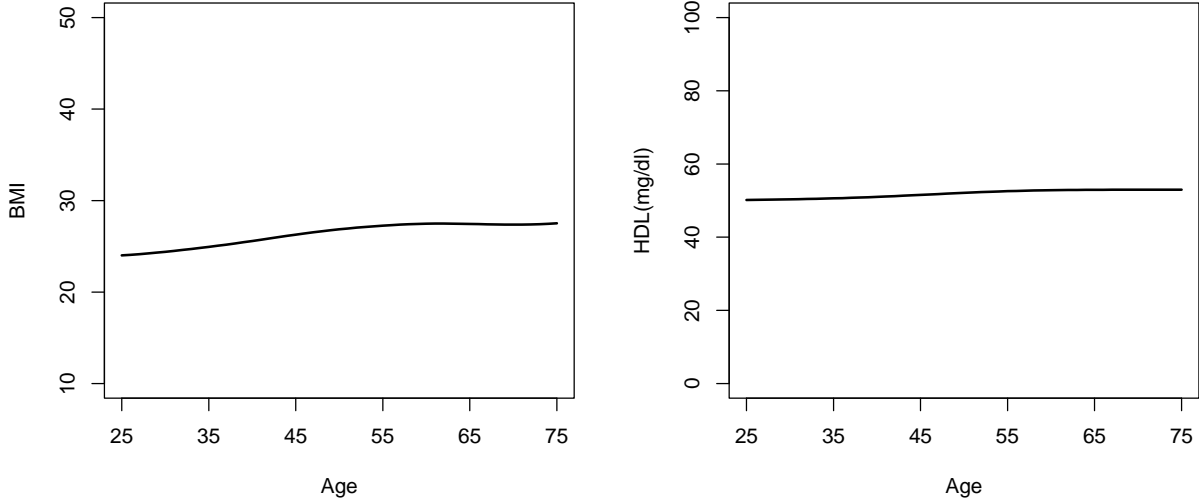

**Figure S2.** The corresponding eigen-functions of the top FPC scores estimated for FHS longitudinal BMI data and HDL data by the PACE procedure. The plot on the left shows the three estimated BMI eigen-functions corresponding to the top three FPC scores. The plot on the right shows the two estimated HDL eigen-functions corresponding to the top two FPC scores.

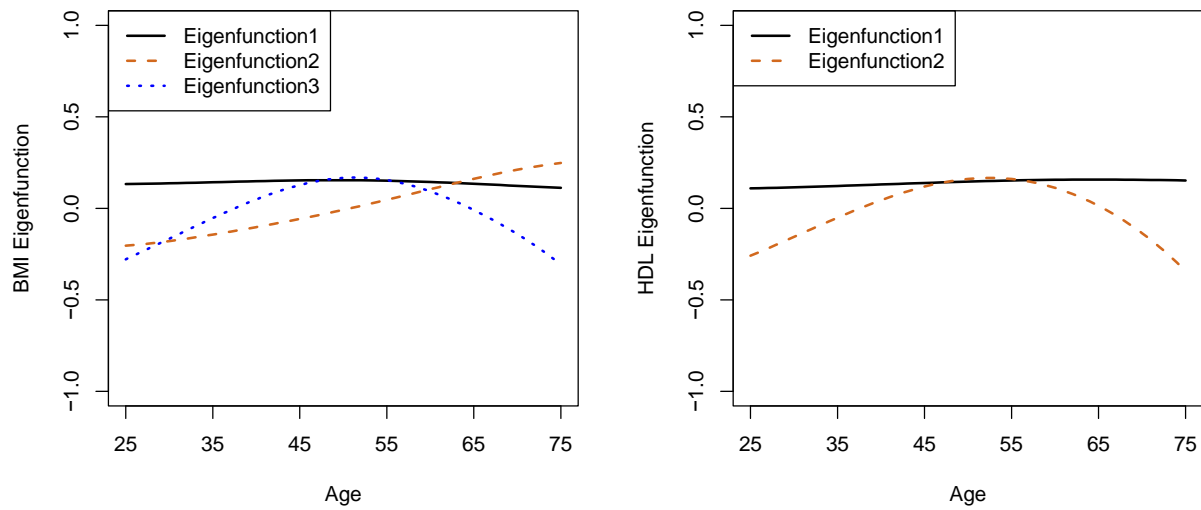

**Figure S3.** PACE-predicted vs. observed HDL data. Each plot shows the HDL data of a randomly selected subject.

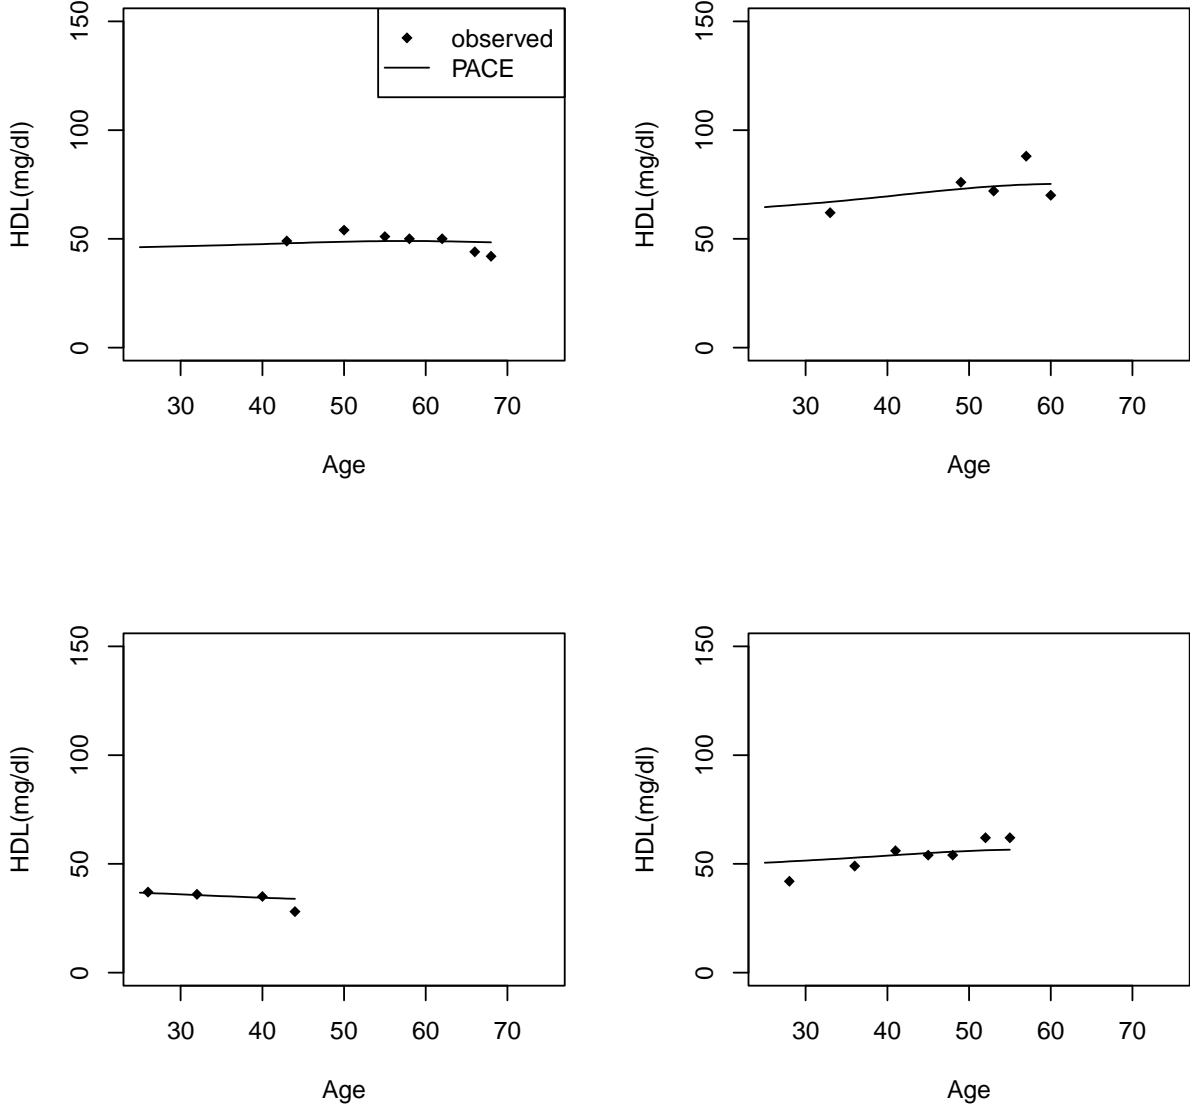

**Figure S4.** The mean of SNP-predicted BMI values by the effect allele count from the first stage of 2SFRI when 14 SNPs were used as separate IVs. The fitted BMI values only include the effects of 14 SNPs, not intercept or the effect of sex.

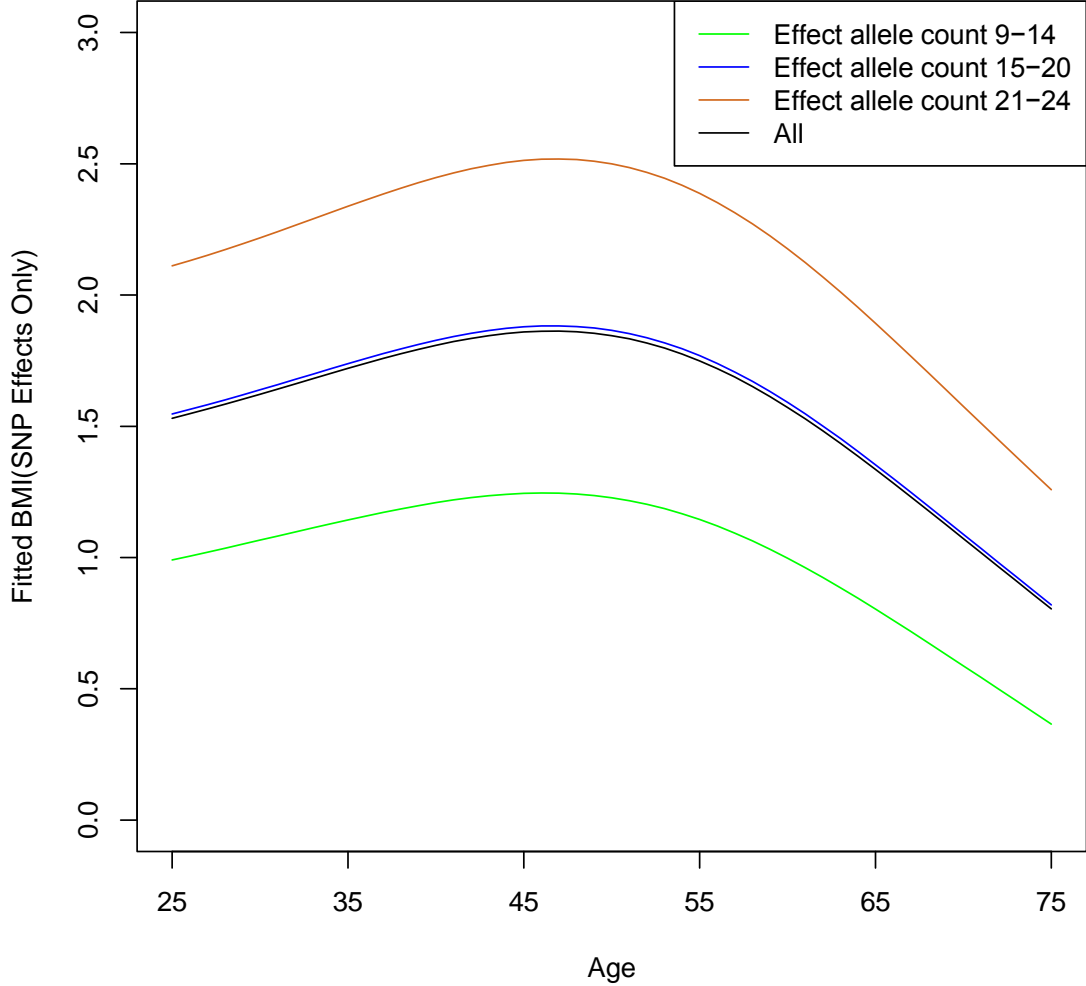

**Table S1.** Empirical Type I error rates of MR analysis by individual clinical visits in simulation set-up II.

| IV      | Visit1 | Visit2 | Visit3 | Visit4 | Visit5 | Visit6 | Visit7 | Uncorrected minP | Bonferroni corrected minP |
|---------|--------|--------|--------|--------|--------|--------|--------|------------------|---------------------------|
| GRS     | 0.041  | 0.044  | 0.047  | 0.044  | 0.043  | 0.047  | 0.042  | 0.104            | 0.018                     |
| 14 SNPs | 0.058  | 0.050  | 0.049  | 0.052  | 0.058  | 0.059  | 0.060  | 0.161            | 0.036                     |

**Table S2.** Empirical statistical power of MR analysis in simulation set-up II.

| Simulation effect size |        |        | IV      | By individual clinical visits |         |         |         |         |         |         | Bonferroni corrected minP |
|------------------------|--------|--------|---------|-------------------------------|---------|---------|---------|---------|---------|---------|---------------------------|
| FPC1                   | FPC2   | FPC3   |         | Visit 1                       | Visit 2 | Visit 3 | Visit 4 | Visit 5 | Visit 6 | Visit 7 |                           |
| 0.027                  | -0.006 | -0.064 | GRS     | 0.155                         | 0.146   | 0.139   | 0.164   | 0.188   | 0.173   | 0.151   | 0.083                     |
|                        |        |        | 14 SNPs | 0.329                         | 0.266   | 0.323   | 0.359   | 0.369   | 0.329   | 0.338   | 0.283                     |
| 0.054                  | -0.012 | -0.128 | GRS     | 0.338                         | 0.254   | 0.298   | 0.347   | 0.437   | 0.366   | 0.413   | 0.238                     |
|                        |        |        | 14 SNPs | 0.709                         | 0.556   | 0.668   | 0.724   | 0.701   | 0.689   | 0.728   | 0.690                     |
| 0.027                  | 0      | 0      | GRS     | 0.142                         | 0.138   | 0.149   | 0.135   | 0.171   | 0.161   | 0.152   | 0.077                     |
|                        |        |        | 14 SNPs | 0.273                         | 0.251   | 0.328   | 0.345   | 0.327   | 0.319   | 0.351   | 0.266                     |

**Table S3.** Analysis of the causal effect of BMI on the risk of T2D by individual clinical visits using the FHS data.

| Clinical visit            | Sample size | MR analysis p-value |        | Observation analysis p-value |
|---------------------------|-------------|---------------------|--------|------------------------------|
|                           |             | GRS                 | 14SNPs |                              |
| 1                         | 1515        | 0.023               | 0.167  | 9.58E-22                     |
| 2                         | 1444        | 0.004               | 0.015  | 6.55E-24                     |
| 3                         | 1489        | 0.004               | 0.041  | 2.67E-20                     |
| 4                         | 1591        | 0.017               | 0.012  | 8.37E-22                     |
| 5                         | 1583        | 0.009               | 0.002  | 1.76E-20                     |
| 6                         | 1505        | 0.002               | 0.108  | 3.38E-14                     |
| 7                         | 1440        | 0.097               | 0.390  | 1.75E-08                     |
| Bonferroni corrected minP |             | 0.014               | 0.014  | 4.59E-23                     |

**Table S4.** Analysis of the causal effect of BMI on the risk of CHD by individual clinical visits using the FHS data.

| Clinical visit            | Sample size | MR analysis p-value |        | Observation analysis p-value |
|---------------------------|-------------|---------------------|--------|------------------------------|
|                           |             | GRS                 | 14SNPs |                              |
| 1                         | 1503        | 0.399               | 0.448  | 0.007                        |
| 2                         | 1431        | 0.412               | 0.290  | 0.005                        |
| 3                         | 1471        | 0.390               | 0.365  | 0.030                        |
| 4                         | 1574        | 0.281               | 0.162  | 0.111                        |
| 5                         | 1563        | 0.298               | 0.145  | 0.264                        |
| 6                         | 1491        | 0.318               | 0.103  | 0.777                        |
| 7                         | 1454        | 0.132               | 0.241  | 0.734                        |
| Bonferroni corrected minP |             | 0.924               | 0.721  | 0.035                        |

**Table S5.** Analysis of the causal effect of HDL on the risk of CHD by individual clinical visits using the FHS data.

| Clinical visit            | Sample size | MR analysis p-value |        | Observation analysis p-value |
|---------------------------|-------------|---------------------|--------|------------------------------|
|                           |             | GRS                 | 14SNPs |                              |
| 1                         | 1438        | 0.413               | 0.894  | 0.340                        |
| 2                         | 1366        | 0.493               | 0.753  | 0.015                        |
| 3                         | 1398        | 0.373               | 0.462  | 0.020                        |
| 4                         | 1506        | 0.656               | 0.870  | 0.028                        |
| 5                         | 1525        | 0.574               | 0.889  | 0.004                        |
| 6                         | 1450        | 0.682               | 0.782  | 0.192                        |
| 7                         | 1416        | 0.317               | 0.585  | 0.965                        |
| Bonferroni corrected minP |             | 1                   | 1      | 0.028                        |
